Running title: SP1 increased hatchability during silkworm domestication

1     **Artificial Selection on *Storage Protein 1* Contributes to Increase of Hatchability**  
2                                   **during Silkworm Domestication**

3     Yanan Zhu<sup>1,2,#</sup>, Lizhi Wang<sup>1,#</sup>, Cencen Li<sup>3</sup>, Yong Cui<sup>1</sup>, Man Wang<sup>1</sup>, Yongjian Lin<sup>1</sup>,  
4     Ruoping Zhao<sup>2</sup>, Wen Wang<sup>2,4</sup>, Hui Xiang<sup>1,2\*</sup>

5     1. Guangzhou Key Laboratory of Insect Development Regulation and Application  
6     Research, Institute of Insect Science and Technology, School of Life Sciences, South  
7     China Normal University, Guangzhou, 510631, China.

8     2. State Key Laboratory of Genetic Resources and Evolution, Kunming Institute of  
9     Zoology, Chinese Academy of Sciences, Kunming 650223, China.

10    3. College of Life Sciences, Xinyang Normal University, Xinyang, 464000, China

11    4. Center for Ecological and Environmental Sciences, Key Laboratory for Space  
12    Bioscience & Biotechnology, Northwestern Poly-technical University, Xi'an, 710072,  
13    China.

14    # These authors are equally contributed.

15    \*Correspondence to: [xiang\\_shine@foxmail.com](mailto:xiang_shine@foxmail.com)

16

Running title: SP1 increased hatchability during silkworm domestication

17 **Abstract**

18 Like other domesticates, efficient utilization of nitrogen resource is also important  
19 for the domestic insect, the silkworm. Deciphering how artificial selection act on  
20 silkworm genome for improved utilization of nitrogen resource and further  
21 human-favored domestication traits will provide unique cues from the insect scenario  
22 for understanding general rules of Darwin's evolutionary theory on domestication.  
23 Storage proteins (SP), which belong to a hemocyanin superfamily, basically serve as a  
24 source of amino acids and nitrogen during metamorphosis and reproduction in insects.  
25 Here through genomic search and further screening of artificial selection signature on  
26 silkworm SPs, we discovered a candidate domestication gene, i.e. the methionine-rich  
27 storage protein1 (*SPI*), which is uniquely diverged from the others and showed  
28 increased expression in the ova of domestic silkworms. Knockout of *SPI* via  
29 CRISPR/Cas9 approach resulted in dramatic decrease in egg hatchability, without  
30 obvious impact on egg production, which was similar to the case in the wild silkworm  
31 compared with domestic one. Larval development or metamorphosis were not  
32 affected by *SPI* knockout. Comprehensive ova comparative transcriptomes indicated  
33 a general repression of gene expression, specifically vitellogenin, chorion proteins and  
34 structural component proteins in the extracellular matrix (ECM)-interaction pathway,  
35 as well as enzymes in folate biosynthesis, in both the mutant and the wild silkworm  
36 with the mutated allele, compared to the wild type domestic silkworm. Wild  
37 silkworms with the wild allele also showed generally down-regulated expression of  
38 genes enriched in structural constituent of ribosome and amide and peptide

Running title: SP1 increased hatchability during silkworm domestication

39 biosynthesis. This study exemplified a novel case that artificial selection could  
40 directly act on nitrogen resource protein to affect egg nutrient and eggshell formation,  
41 and activate ribosome for improved biosynthesis and increased hatchability during  
42 domestication. The findings shed new light on both understanding of artificial  
43 selection and silkworm breeding from the angle of nitrogen and amino acid resource.  
44

Running title: SP1 increased hatchability during silkworm domestication

45 **Author summary**

46 Like other domesticates, nitrogen resource is also important for the domestic insect,  
47 the silkworm. Deciphering how artificial selection act on silkworm genome for  
48 improved utilization of nitrogen resource and further human-favored domestication  
49 traits, will provide unique cues from insect scenario, for understanding general rules  
50 of Darwin's evolutionary theory. However, mechanism of domestication in the  
51 silkworm is largely unknown to date. Here we focused on one important nitrogen  
52 resource, i.e, the storage proteins (SP). We discovered that the methionine-rich  
53 storage protein1 (*SP1*) which is divergent from the other SPs are the only target of the  
54 artificial selection. We proposed based on functional evidence together with the key  
55 findings of comprehensive comparative transcriptome, that artificial selection, on one  
56 hand favored higher expression of *SP1* in the domestic silkworm, which would  
57 subsequently up-regulate the genes or pathways vital for egg development and  
58 eggshell formation. On the other hand, artificial selection consistently favored  
59 activated ribosome activities and improved amide and peptide biosynthesis and in the  
60 ova, as it might act in the silk gland for increased silk-cocoon yield. We here  
61 exemplified a novel case that artificial selection could directly act on nitrogen  
62 resource protein for human desired domestication trait.

63

Running title: SP1 increased hatchability during silkworm domestication

## 64 **Introduction**

65 The silkworm *Bombyx mori* is the only fully domestic insect species, which  
66 originated from its wild ancestor *B. mandarina* about 5000 years ago. During this  
67 process, the domestic silkworm evolved rapidly under human-preferred selection.  
68 Deciphering how artificial selection act on silkworm genome for human-favored  
69 domestication traits, will provide unique cues from insect scenario, for understanding  
70 general rules of Darwin's evolutionary theory. Recently, by population and  
71 evolutionary genomic analyses on domestic and wild silkworm individuals, we  
72 recently found that nitrogen and amino acid metabolism pathways and specifically  
73 genes in glutamate and aspartate metabolism, were under artificial selection and could  
74 affect the metamorphosis and cocoon yield [1]. These findings suggest that, like  
75 domestic plants and animals, domestic silkworms also tend to have efficient  
76 utilization of nitrogen resources to adapt to human-preference [1-3]. Besides the  
77 glutamate and aspartate metabolism which is an ammonia re-assimilated system[4],  
78 we further wonder whether other kind of nitrogen resources are also affected by  
79 artificial selection. If this is the case, how they contributed to silkworm phenotypic  
80 changes during domestication.

81 Insect storage proteins (SP) are another important source of amino acids and  
82 nitrogen, which belong to a special conserved arthropod hemocyanin superfamily [5].  
83 Most insects have at least two main kinds of storage proteins, i.e, arylphorin and  
84 methionine-rich storage proteins and some species have other non-typical SPs [6]. *SPs*  
85 have been cloned or predicted in many insect species, including Lepidoptera moths

Running title: SP1 increased hatchability during silkworm domestication

86 and butterflies [7-10]. Insect SPs are suspected to serve as a source of amino acids  
87 and nitrogen for the pupae and adults during metamorphosis and reproduction [11],  
88 however solid functional evidence on its biological significance is rather few [9, 12].  
89 In plants, storage proteins are mainly reserved in seeds, together with other nutrient  
90 such as oil and starch, to supply energy for seed germination, growth [13, 14].  
91 Especially in crops, seed SPs function in providing energy for humans and animals  
92 and they are of great interest and target for breeding and improvement [13-15].

93 In the domestic insect, the silkworm, previous studies preliminarily characterized  
94 three SPs mainly based on cues of gene or protein expression pattern [7, 16-18].  
95 Especially the methionine-rich SP1 was implied to contribute to adult female  
96 characters [7] and related to synthesis of vitellogenin (Vg), the precursor of yolk  
97 protein [16]. SP2 coupled with SP3 form a heterohexamer and has the inhibitory  
98 effects on cell apoptosis [17, 18]. Whether SPs are also important in the silkworm  
99 domestication, as observed in domesticated plants, given the importance of nitrogen  
100 supply in silkworm domestication, needs deep exploration of their biological and  
101 evolutionary significances.

102 Development of genomics and genome-editing techniques provide tools for  
103 efficiently decipher the evolutionary and functional significances of interested genes  
104 [19, 20]. Here in this study, we conducted a genome-wide identification of silkworm  
105 SPs and taking advantages of the genomic data resource of a batch of representative  
106 domestic and wild silkworms [1], we conducted selection signature screening of these  
107 silkworm SPs followed by functional verification via CRISPR/Cas9 knockout system

Running title: SP1 increased hatchability during silkworm domestication

108 and comprehensive comparative ova transcriptomes of the wild type and mutant  
109 silkworms as well as domestic and wild silkworms. The findings here suggested that  
110 artificial selection on *SP1* contribute to increased production during silkworm  
111 domestication, possibly by upregulation of vitellogenin and egg development and  
112 eggshell formation, to promote egg hatchability during domestication. These findings  
113 provide a novel case with functional evidence and figure out a frame of regulation on  
114 a silkworm domestication gene, which illuminated that artificial on nitrogen and  
115 amino acid supply will be also required for improved silkworm reproduction.

116

## 117 **Results**

### 118 ***SP1 is diverged from the other SPs and is the only one targeted by artificial*** 119 ***selection***

120 Totally, we identified 7 *SPs* in the silkworm genome by blast search. *SP1* showed the  
121 dramatically highest methionine content (10.98%) (Table 1). Phylogenetic analysis  
122 showed that *SP1* was one distinct clade whereas the others were in another one,  
123 indicating an obvious divergence between *SP1* and the others (Fig 1A). *SP1* is located  
124 in Chromosome 23 and the others are clustered in Chromosome 3, suggesting possible  
125 tandem duplication events during evolution. Interestingly, by screening of artificial  
126 selection signatures on the genomic region bearing *SP1* and the other *SPs*  
127 respectively, we detected strong signatures in the *SP1* region (see material and  
128 methods) (Fig 1B and 1C). Furthermore, we detected strong differentiation in allelic  
129 frequency in the upstream of *SP1* (Fig 1D). Correspondingly, *SP1* were differentially

Running title: SP1 increased hatchability during silkworm domestication

130 expressed in the ova between domestic and wild silkworms, with higher expression in  
131 the domestic one (Fig 1E). We also detected 11 SNPs that caused amino acid changes  
132 in the coding sequence of the gene (S1 Fig), despite that the biological significance of  
133 these SNPs needs further evaluation. These results suggest that artificial selection on  
134 *SP1* during silkworm domestication might affect the function of this gene in domestic  
135 silkworms, at least in terms of gene expression.

### 136 ***Knockout of SP1 by CRISPR/Cas9***

137 To explore the functional impact of *BmSp1* in silkworm domestication, we firstly  
138 investigated the biological role of this gene in the silkworm through CRISPR/Cas9  
139 knocking out system. For single guide RNA (sgRNA) design, we selected highly  
140 specific targets in the first exon close to the translation starting site, namely, S1 and  
141 S2 (Fig 2A). We choose another site S3 close to the end of the first exon, more than  
142 60 bp downstream of S1 and S2 (Fig 2A and Table 2), to obtain a potentially large  
143 fragment deletion by injecting the pool of three gRNAs. After mutation screening of  
144 the injected eggs (G0 generation), the gRNAs targeting the above three sites  
145 successfully guided DNA editing and generated a variety of mutation types, including  
146 4–9 bp deletions or small insertions followed by a large deletion (Fig 2B).

147 By mutation screening of the exuviae of the fifth instar larva in the G0 cocoon, we  
148 successfully identified 26 mosaic mutant G0 moths. We then generated pairwise  
149 crosses of these G0 mutants with similar mutant genotypes for the G1 populations.  
150 After mutation screening of the G1 eggs, we selected two populations with large  
151 deletions for further feeding and mutation screening (see Material and methods).



Running title: SP1 increased hatchability during silkworm domestication

152 Finally, in the G2 generation we obtained two types of homozygous mutants, i.e.,  
153 MU1 and MU2 (Fig 2C). As to MU1, there was an 8 bp insertion followed by a 63 bp  
154 deletion in the *BmSP1* coding sequences. As to MU2, there was a 4 bp insertion  
155 followed by a 65 bp deletion. The mutations occurred at +29 bp of the first *SP1* exon  
156 in MU1 and MU2, respectively (Fig 2C), resulting in reading frame shift mutations  
157 and severe premature termination close to the translation starting site, with stop  
158 signals at +10 aa and +37 aa of the *SP1* protein (Fig 2D).

159 ***Both SP1 mutants and the wild silkworm had decreased hatching rate and Vg***  
160 ***expression***

161 We selected and maintained MU1 population for assay on phenotypes related to  
162 reproduction and metamorphosis, such as number of eggs, hatching rate, pupa weight,  
163 and cocoon weight. Compared with the wild-type, which showed hatching rates of  
164 about 90%, the hatching rates of *SP1* mutants were dramatically decreased, with a  
165 mean egg hatching rate of about 40% (Fig 2E), whereas the number of eggs produced  
166 was not obviously affected (Fig 2E) , neither did the whole pupa weight or cocoon  
167 shell weight (Fig 2E). Given that the data were obtained from large replicates (126  
168 replicates for hatchability assay and 320 replicates for pupa and cocoon weight), the  
169 results are convincing. Loss-of-function mutation resulted in significant decreased  
170 expression of *SP1* and *Vg* in the ova, based on the RNA-seq data (Fig 2F).

171 Given that knockout of *SP1* caused reduced hatching rate (Fig 2E) and that  
172 expression of *SP1* in the ova of wild silkworm were significantly lower than that of  
173 domestic one, we further suspected that artificial selection on *SP1* might improve

Running title: SP1 increased hatchability during silkworm domestication

174 silkworm hatching rate during domestication. Supporting this hypothesis, we found  
175 that hatching rates of the wild silkworm were generally lower compared with that of  
176 the domestic one and, similar to *SP1* mutant, no obvious differences was detected in  
177 egg production between the wild and the domestic silkworm (Fig 3A). The lower  
178 hatching rate of wild silkworm was also reported in other studies [21, 22]. Meantime,  
179 we also found that similar to *SP1* mutants, expression of *Vg* in the ova of the wild  
180 silkworm was drastically lower compared with domestic one (Fig 3B). These results  
181 suggested that in the silkworm *SP1* may positively affect expression of *Vg* of ova and  
182 contribute to silkworm egg development. Promotion of *SP1* expression in the  
183 domestic silkworm thus results in the correspondingly up-regulation of *Vg*, which  
184 further contributes to increased hatchability during silkworm domestication.

185 ***Genes involved in egg development and eggshell formation were both repressed in***  
186 ***SP1 mutant and the wild silkworm***

187 In order to further exploring the regulation network and possible molecular  
188 mechanism of female specific *SP1* on egg hatchability, we generated comprehensively  
189 Ova comparative transcriptome analyses between the wild type and the mutant, as  
190 well as domestic and wild silkworm (*Bombyx mandarina*), with 4.87~9.15 Gb  
191 RNA-seq data for each sample (S1 Table). Totally, there were 561 genes identified as  
192 differential expressed genes (DEGs) in the *SP1* knockout mutants (MU1) compared to  
193 wild-type silkworm, with down-regulated genes (341) significantly more than  
194 up-regulated ones (220) ( $p=0.0003$ , Chi-squared test with Yates' continuity  
195 correction) (Fig. 4A and S2 Table). As expected, there are much more differential

Running title: SP1 increased hatchability during silkworm domestication

196 expressed genes (2882) between the wild and domestic silkworm, since wild  
197 silkworm are much more genetically and phenotypically different from the domestic  
198 one, compared with the silkworm mutant. It is interesting that, down-regulated genes  
199 (1761) were also significantly more than up-regulated (1121) ones ( $p=2.2e-16$ ,  
200 Chi-squared test with Yates' continuity correction) (Fig 3A and S3 Table). The results  
201 suggested that transcriptome repression in ova might be an output of SP1 depletion, in  
202 both the SP1-KO mutant (Fig 2F and Fig 4A) and in the wild silkworm (Fig 1E and  
203 Fig 4A).

204 We identified 302 common genes shared in the two sets of DEGs. KEGG  
205 enrichment analysis indicated that these common differential expressed genes were  
206 significantly enriched in pathways related to cell proliferation, such as ECM-receptor  
207 interaction and folate biosynthesis. GO enrichment analysis indicated that they were  
208 enriched in reproduction related biological processes such as ovarian follicle cell  
209 development, chorion-containing eggshell formation (Fig 4B) and these genes was  
210 also enriched in the molecular function of structural constituent of chorion (Fig 4B).  
211 Factually they are all annotated as chorion proteins, including 4 chorion class CB  
212 protein M5H4-like genes (*BGIBMGA003248*, *BGIBMGA009720*, *BGIBMGA009719*,  
213 *BGIBMGA009715*), a chorion class B protein PC10 (*BGIBMGA009721*) and a  
214 Chorion 1 domain containing gene (*BGIBMGA005877*). All these chorion like genes  
215 are down regulated except *BGIBMGA009720* (Fig 4B, Table S2, S3). Genes in  
216 ECM-receptor interaction pathway includes collagens and integrins (S2 Fig) and those  
217 in folate biosynthesis includes folylpolyglutamate synthase, involved in

Running title: SP1 increased hatchability during silkworm domestication

218 7,8-Dihydrofolate (DHF) and 5,6,7,8-Tetrahydrofolate (THF) which are substrates for  
219 subsequent one carbon pool mediated by folate (S3 Fig). Extend to all the enriched  
220 genes, it is notable that they were mostly down-regulated, in both the SP1 mutant and  
221 the wild silkworm (Fig 4B). This results suggested that the common influence of  
222 repression of *SP1* in both the SP1 mutant and the wild silkworm at transcriptome level  
223 is on genes or pathways involved in reproduction, such as ovarian follicle cell  
224 development or proliferation, and eggshell formation.

225 We further generated enrichment analyses on DEGs in the two sets of comparison  
226 independently and observed consistent pattern (Table 3 and 4). Functional enrichment  
227 analysis of DGEs between wild-type silkworm and *SP1* mutant silkworm reveals  
228 significantly enriched the KEGG pathway “ECM-receptor interaction” and the GO  
229 terms, including ovarian follicle cell development and eggshell formation process,  
230 functioning as structural constituent of chorion (Table 3) and the related genes are  
231 mostly down-regulated. Consistently, These GO items were also in the top rank with  
232 the lowest p value when analyzing the DEGs between wild and domestic silkworm  
233 (Table 4). The involved genes in these KEGG or GO terms were nearly all  
234 down-regulated in the wild silkworm (Table 4). These results further supported that in  
235 the wild silkworm, repression of *SP1* may result in suppressed expression of ovarian  
236 follicle cell development and eggshell formation process.

237 ***Ribosome proteins and genes in amide and peptide biosynthetic processes were also***  
238 ***repressed in the wild silkworm.***

239 DEGs between wild and domestic silkworms were significantly enriched in

Running title: SP1 increased hatchability during silkworm domestication

240 function of structural constituent of ribosome. The related genes are mostly ribosome  
241 proteins (S4 Fig). We also noted that the related biological progresses, such as amide  
242 and peptide biosynthetic processes was also in the top rank with the lowest p value  
243 (Table 4). The related genes were also mostly down-regulated in the wild silkworm.  
244 However, during domestication, there might be other factors that contributes to  
245 improved hatchability, that is, improved amide and peptide biosynthesis and activated  
246 ribosome activities in the ovarian.

## 247 **Discussion**

248 Nitrogen resource is very important for silkworm domestication. The domestic  
249 silkworm tend to have efficient utilization of nitrogen resources for yielding protein  
250 outputs to adapt to human-preference. Here in this study, we discovered that artificial  
251 selection could directly act on nitrogen resource gene, i.e, storage protein1 (*SPI*), for  
252 improved silkworm hatchability. SPs are also of target loci of breeding in crops [23].  
253 However, in the crops, human could directly benefit from the nutrient of these  
254 improved SPs [15] whereas in the silkworm, the benefits of SPs are increased  
255 silkworm reproductive capacity.

256 Among all the SPs identified, SP1 is quite diverged and somewhat unique from  
257 the others, in terms of both genomic location and phylogenetic position. Similar  
258 pattern was also observed in other Lepidoptera species, such as tobacco hornworm,  
259 *Manduca sexta* [24], suggesting that *SPI* might evolve dependently while the other  
260 type of *SPs* might have experienced duplication during Lepidoptera evolution.  
261 Methionine-rich SP1 seems to be of special interest, since methionine is reported to be

Running title: SP1 increased hatchability during silkworm domestication

262 an important amino acid for the tradeoff between growth and reproduction [25]. In  
263 *Drosophila*, dietary methionine restriction extends lifespan [25], while in  
264 grasshoppers, a reduced reproduction-induced increase in expression methionine-rich  
265 protein occurred during life extension [26]. Similarly, in the beet armyworm,  
266 silencing of Sp1 by RNA interference (RNAi) decreases larval survival, which  
267 indicate the role of the methionine-rich SP in growth and metamorphosis[12]. We  
268 therefore added an new evidence that different to grasshopper [26] and the beet  
269 armyworm[12], but similar to *Drosophila*[25], silkworm methionine-rich SP1  
270 functions in reproduction process but not obviously affect growth.

271 Given that in those cocoon-producing silk moths, another nitrogen utilization  
272 system such as glutamate/glutamine cycle system were reported to be vital in  
273 metamorphosis silk-cocoon production [1, 4, 27], we suspect that strategy of nitrogen  
274 resource allocation via storage proteins may be diverged or modified during  
275 Lepidoptera insect evolution. Here in the silkworm, function of SP1 limited to  
276 influencing egg hatching rate. Artificial selection acted only on *SPI*, again suggesting  
277 functional importance of SP1 rather than the other SPs, for human-preferred  
278 domestication traits, i.e, increased hatchability.

279 Ova comparative transcritiome analyses further illustrated a frame of regulation  
280 network of SP1 on hatchability. Vitellogenin(Vg), chorion proteins, structural  
281 component proteins in the extracellular matrix (ECM)-interaction pathway such as  
282 collagen and integrins, and synthetase in folate biosynthesis are all generally  
283 repressed in both the *SPI* mutant and the wild silkworm. Thus, artificial selection

Running title: SP1 increased hatchability during silkworm domestication

284 acting on *SP1* for increased hatchability, possibly thorough direct or indirect influence  
285 on those genes, pathway or biological processes. Vg is the main nutrition for  
286 silkworm egg formation and embryonic development. It appears and accumulates at  
287 the stage when SP1 rapidly declined and disappeared in the fat body shortly before  
288 adult emergence [16, 28]. SP1 may supplies amino acids for synthesis of Vg, as  
289 previously reported in *Plutella xylostella* (Yaginuma & Ushizima, 1991). Chorion  
290 proteins are the major component of the silkworm eggshell that have the essential  
291 function of protecting the embryo from external agents during development while  
292 allowing gas exchange for respiration. Eggshell (chorion) is constructed by the  
293 ovarian follicle cells. The follicle cell epithelium surrounds the developing oocyte and  
294 in the absence of cell division synthesizes a multilayer ECM [29]. Eggshell ECM  
295 were usually linked by integrins, a family of transmembrane receptor proteins to the  
296 cytoskeleton of oocyte. Via a series of signal transduction, ECM-integrins functions in  
297 oocyte movement, differentiation, and proliferation [29]. Integrins was reported to  
298 function in formation of actin arrays in the egg cortex [30] and it is also involved in  
299 tracheole morphogenesis which is for respiration [31]. Folate is one of B-vitamin  
300 cofactors with and functions in transferring various single-carbon units. The key  
301 folylpolyglutamate synthase is involved in production of 7,8-Dihydrofolate (DHF)  
302 and 5,6,7,8-Tetrahydrofolate (THF) which are substrates for subsequent one carbon  
303 pool mediated by folate. In human, folate is used as a supplement by women  
304 during pregnancy to prevent neural tube defects (NTD) in the baby, and low levels in  
305 early pregnancy are believed to be the cause of more than half of babies born

Running title: SP1 increased hatchability during silkworm domestication

306 with neural tube defects, indicating its important role for fetal development [32]. In  
307 insects, folate also plays important roles in egg development. It could promote  
308 biosynthesis of nucleic acids in the ovaries, and evoke mitoses in cells of the  
309 collicular epithelium [33-35].

310 Notably, increased hatchability during domestication may not be solely attributed  
311 to increased expression of *SP1* and the associated downstream genes, given that  
312 artificial selection acts on hundreds of gene loci in silkworm genome [1, 36] and that  
313 ova comparative transcriptome between wild and domestic silkworm identified much  
314 more genes than that between SP1 mutant and wild type silkworm. We factually  
315 observed significantly enriched pathway and structural constituent of ribosome, the  
316 protein translation machinery and involved biological processes in amide and peptide  
317 biosynthesis, are generally lower expressed in the wild silkworm compared with  
318 domestic silkworm (Table 4). These results again supported the importance of  
319 nitrogen and amino acid in silkworm domestication, not only for silkworm protein  
320 output [1], but also for productivity.

321 Similar to other domesticates, hatchability of silkworm eggs directly determine  
322 quantity of offspring, and thus it is an important productivity trait human favorably  
323 selected during domestication. Based on the results and the discussion above, we  
324 proposed that artificial selection, on one hand favored higher expression of *SP1* in the  
325 domestic silkworm, which would subsequently up-regulate the genes or pathways  
326 vital for egg development and eggshell formation. On the other hand, artificial  
327 selection consistently favored activated ribosome activities and improved amide and



Running title: SP1 increased hatchability during silkworm domestication

328 peptide biosynthesis and in the ova, as it might act in the silk gland for increased  
329 silk-cocoon yield [1]. As an output, domestic silkworm demonstrates improved  
330 increase egg hatchability compared with its wild ancestor.

## 331 **Materials and Methods**

### 332 **Silkworm strains**

333 A multivoltine silkworm strain, Nistari, was used in all experiments. Larvae were  
334 reared on fresh mulberry leaves under standard conditions at 25°C. The wild  
335 silkworms were collected in Zhejiang province, China and maintained as laboratory  
336 population in our lab.

### 337 **Silkworm genomic data resource**

338 The silkworm *Bombyx mori* reference genome and related data used for searching and  
339 screening of artificial selection signature on silkworm SPs is our updated version  
340 (<https://doi.org/10.5061/dryad.fn82qp6>); those for RNA-seq data analyses were  
341 obtained from Ensemble database  
342 ([http://metazoa.ensembl.org/Bombyx\\_mori/Info/Index](http://metazoa.ensembl.org/Bombyx_mori/Info/Index)).

### 343 **Genomic search of *B.mori* SPs and Phylogenetic analysis of SPs**

344 The reference sequences of *B. mori* storage proteins (SP1, SP2, SSP2 and SP3) were  
345 retrieved from the NCBI GenBank. These sequences were used as queries searching for  
346 homologs in the *B. mori* genome by tblastn with e-value  $<10^{-7}$ . Other insect homologs  
347 of the silkworm SPs were searched in GenBank (<https://blast.ncbi.nlm.nih.gov/>) by  
348 BLASTP with an e-value  $<10^{-7}$ . We selected sequences from several representative  
349 Lepidoptera species and *Drosophila melanogaster* as candidate proteins for further

Running title: SP1 increased hatchability during silkworm domestication

350 analyses. The sequences of the SP1 homologs were aligned using MEGA 6.0 software  
351 [37]. A gene tree was constructed using The Bayes tree was constructed by  
352 MrBayes-3.1.2 with GTR + gamma substitution model. The gene-ration number was  
353 set as 1000000 and the first 25% was set as burn-in. Other parameters were set as  
354 default.

### 355 **Molecular selection of Sp1 in domesticated and wild silkworm populations**

356 Based on the available whole genomic Single nuclear polymorphic data (SNP) of  
357 domesticated and wild silkworm populations [1],  
358 (<https://doi.org/10.5061/dryad.fn82qp6>), we screened the selection signatures of the  
359 silkworm *SPs*, according to Xiang et al's pipeline [1]. Allelic frequency and SNP  
360 annotation was calculated by in-house Perl scripts.

### 361 **Design of sgRNA target and in vitro synthesis of sgRNA and Cas9 mRNA**

362 The 20 bp sgRNA targets immediately upstream of PAM were designed by the online  
363 platform CRISPRdirect (<http://crispr.dbcls.jp/>)[38]. The sgRNA DNA template was  
364 synthesized by PCR, with Q5® High-Fidelity DNA Polymerase (NEB, USA). The  
365 PCR conditions were 98°C for 2 min, 35 cycles of 94°C for 10 s, 60°C for 30 s, and  
366 72°C for 30 min, followed by a final extension period of 72°C for 7 min. The sgRNA  
367 were synthesized based on the DNA template *in vitro* using a MAXIscript® T7 kit  
368 (Ambion, Austin, TX, USA) according to the manufacturer's instructions. The Cas9  
369 construct was a kind gift provided by the Shanghai Institute of Plant Physiology and  
370 Ecology (Shanghai, China). The Cas9 vector was pre-linearized with the NotI-HF®  
371 restriction enzyme (NEB, USA). The Cas9 mRNA was synthesized *in vitro* with a

Running title: SP1 increased hatchability during silkworm domestication

372 mMMESSAGE mMACHINE® T7 kit (Ambion, Austin, TX, USA) according to the  
373 manufacturer's instructions. All related primers are shown in Table 2.

#### 374 **Microinjection of Cas9/gRNAs**

375 Fertilized eggs were collected within 1 h after oviposition and microinjection was  
376 within 4 h. The Cas9-coding mRNA (500 ng/μL) and total gRNAs (500 ng/μL) were  
377 mixed and injected into the preblastoderm Nistari embryos (about 8 nl/egg) using a  
378 micro-injector (FemtoJet®, Germany), according to standard protocols (Tamura,  
379 2007). The injected eggs were then incubated at 25°C for 9–10 d until hatching.

#### 380 **Cas9/gRNAs-mediated mutation screening and analyses of germline mutation** 381 **frequency**

382 To calculate the efficiency of Cas9/gRNAs-mediated gene mutation in the injected  
383 generation (G0), we collected ~10% of the eggs (64 out of 600) 5 d after injection to  
384 extract genomic DNA for PCR, with primers Sp1-F and Sp1-R (Table 2). The  
385 amplified fragments were cloned into a pMD™19-T simple vector (Takara, Japan)  
386 and sequenced to determine mutation type and mutagenic efficiency.

387 When the injected G0 silkworms pupated, we collected silkworm exuviae from  
388 fifth instar larvae in each cocoon. Individual DNA was then extracted Genomic DNA  
389 was extracted using a TIANamp Blood DNA Kit (Tian gen Biotech, Beijing)  
390 according to the manufacturer's instructions. Individual mutation screening was  
391 generated with PCR with 94°C for 2 min, 35 cycles of 94°C for 30 s, 57°C for 30 s,  
392 and 72°C for 45 s, followed by a final extension period of 72°C for 5 min. PCR  
393 products were cloned to pMD™19-T simple vector (Takara, Japan) and sequenced.

Running title: SP1 increased hatchability during silkworm domestication

394 **Homozygous mutant screening and mutation effect on inferred protein**

395 Mosaic mutant moths were obtained from the above mutation screening of exuviae  
396 DNA from fifth instar larvae. Moths with the same mutation site were pairwise  
397 crossed with each other to acquire G1 offspring. About 7 d after the G1 eggs were  
398 laid, we collected ~30 eggs of each offspring population from one parental pair and  
399 pooled them to extract genomic DNA for mutation screening by PCR. The amplified  
400 fragments were cloned into a pMD<sup>TM</sup>19-T simple vector (Takara, Japan) and  
401 sequenced to determine the exact mutation type. Two G1 offspring populations with  
402 large deletions in *BmSp1* were selected for further breeding. At the pupa stage, 20  
403 randomly selected individuals within each population were subjected to mutation  
404 screening of exuviae DNA. Homozygous mutant moths with the same identified  
405 mutant genotype were crossed for G2 offspring. Mutation effects on proteins were  
406 evaluated using MEGA 6/0 software[37] by codon alignment of the wild type and the  
407 mutant.

408 **Phenotypic assay**

409 On the fourth day of pupation (P4), the silkworms had successfully pupated. We  
410 weighed every 10 individuals as a group, recorded the whole cocoon weight, pupa  
411 weight, and cocoon shell weight, respectively, and calculated the ratio of pupa weight  
412 to whole cocoon weight. In total, 32 replicates for the mutants and 11 replicates for  
413 the wild-type silkworms were set, respectively. Offspring of the homozygous mutants  
414 and wild-type silkworms were incubated at 25°C for 9–10 d until hatching. Number of  
415 Egg produced and egg hatching rate were determined. Eighty-three, forty-three, and

Running title: SP1 increased hatchability during silkworm domestication

416 fourteen replicates were set for the two mutant (SP1-MU1, SP1-MU2) and wild-type  
417 populations.

418 Number of eggs produced and the hatching rate of the wild silkworm were also  
419 recorded. Ten replicated was set repeated two times.

#### 420 **Ova dissection, total RNA isolation and RNA-seq**

421 Ova from virgin moth of the domestic wild type silkworm, SP1 mutant and the wild  
422 type were dissected and used to extract total RNA with three replicates. Total RNA  
423 were isolated using TRIzol (Invitrogen). For each sample, RNA were sent to  
424 Novogene Bioinformatics Institute (Beijing, China) for cDNA library construction  
425 and RNA-seq. Six cDNA libraries were sequenced by Illumina Hiseq 2500 (Illumina,  
426 San Diego, CA, USA) with 125 bp paired-end reads according to the manufacturer's  
427 instructions.

#### 428 **Analyses on RNA-seq data**

429 Raw data were filtered with the following criteria: (1) reads with  $\geq 10\%$  unidentified  
430 nucleotides (N); (2) reads with  $> 10$  nt aligned to the adapter, allowing  $\leq 10\%$   
431 mismatches; and (3) reads with  $> 50\%$  bases having phred quality  $< 5$ . The clean data  
432 were mapped to the *Bombyx mori* reference genome using Tophat with 2 nt fault  
433 tolerance and analyzed using Cufflinks [39]. The expression value of each gene was  
434 calculated and normalized using fragments per kilobase of exon per million reads  
435 mapped (FPKM) [39]. In order to identify differentially expressed genes, Cuffdiff was  
436 used to perform pairwise comparisons between wild-typed and SP1 mutant samples,  
437 as well as the wild and domestic silkworm, respectively, with corrected *P*-value of

Running title: SP1 increased hatchability during silkworm domestication

438 0.05 <5 and Log<sub>2</sub>-fold change>1.

439 KEGG and GO enrichment analyses of differentially expressed genes were  
440 performed with an online platform (<http://www.omicshare.com/tools/>), using all the  
441 annotated genes in *Bombyx mori* as background.

442

443 **Data availability.** RNA-seq data were deposited in the NCBI Short Read Archive  
444 database under the accession SAMN09700389-SAMN09700397.

445

#### 446 **Acknowledgements**

447 We thank Anli Chen, Muwang Li and Lang You for their kind helps in silkworm  
448 maintaining, and Anjiang Tan for his kindly providing the Cas9 vector. We thank  
449 Shuai Zhan for his help in genomic data analyses and mining. This work was  
450 supported by a National Basic Research Program of China (No. 2013CB835204) and  
451 a grant of National Natural Science Foundation of China (No. 31371286).

#### 452 **References**

453

- 454 1. Xiang H, Liu X, Li M, Zhu Y, Wang L, Cui Y, et al. The evolutionary road from wild moth to  
455 domestic silkworm. *Nat Ecol Evol.* 2018. doi: 10.1038/s41559-018-0593-4. PubMed PMID: 29967484.
- 456 2. Hufford MB, Xu X, van Heerwaarden J, Pyhajarvi T, Chia JM, Cartwright RA, et al. Comparative  
457 population genomics of maize domestication and improvement. *Nat Genet.* 2012;44(7):808-11. doi:  
458 10.1038/ng.2309. PubMed PMID: 22660546; PubMed Central PMCID: PMC5531767.
- 459 3. Wiener P, Wilkinson S. Deciphering the genetic basis of animal domestication. *Proc Biol Sci.*  
460 2011;278(1722):3161-70. doi: 10.1098/rspb.2011.1376. PubMed PMID: 21885467; PubMed Central  
461 PMCID: PMC3169034.
- 462 4. Hirayama C, Nakamura M. Regulation of glutamine metabolism during the development of  
463 *Bombyx mori* larvae. *Biochim Biophys Acta.* 2002;1571(2):131-7. PubMed PMID: 12049793.
- 464 5. Xie W, Luan YX. Evolutionary implications of dipluran hexamerins. *Insect biochemistry and*  
465 *molecular biology.* 2014;46:17-24. doi: 10.1016/j.ibmb.2014.01.003. PubMed PMID: 24462816.
- 466 6. Haunerland NH. Insect storage proteins: gene families and receptors. *Insect biochemistry and*

Running title: SP1 increased hatchability during silkworm domestication

- 467 molecular biology. 1996;26:11.
- 468 7. Sakurai H, Fujii T, Izumi S, Tomino S. Structure and expression of gene coding for sex-specific  
469 storage protein of *Bombyx mori*. The Journal of biological chemistry. 1988;263(16):7876-80. PubMed  
470 PMID: 2836399.
- 471 8. Gkouvtas T, Kourti A. Juvenile hormone induces the expression of the SnoSP2 gene encoding a  
472 methionine-rich hexamerin in *Sesamia nonagrioides* (Lepidoptera). Comparative biochemistry and  
473 physiology Part B, Biochemistry & molecular biology. 2009;153(2):206-15. doi:  
474 10.1016/j.cbpb.2009.02.017. PubMed PMID: 19275945.
- 475 9. Sonoda S, Fukumoto K, Izumi Y, Ashfaq M, Yoshida H, Tsumuki H. Methionine-rich storage  
476 protein gene in the rice stem borer, *Chilo suppressalis*, is expressed during diapause in response to  
477 cold acclimation. Insect molecular biology. 2006;15(6):853-9. doi: 10.1111/j.1365-2583.2006.00670.x.  
478 PubMed PMID: 17201777.
- 479 10. Zhu YC, Muthukrishnan S, Kramer KJ. cDNA sequences and mRNA levels of two hexamerin  
480 storage proteins PinSP1 and PinSP2 from the Indianmeal moth, *Plodia interpunctella*. Insect  
481 biochemistry and molecular biology. 2002;32(5):525-36. PubMed PMID: 11891129.
- 482 11. Telang A, Buck NA, Wheeler DE. Response of storage protein levels to variation in dietary protein  
483 levels. Journal of insect physiology. 2002;48(11):1021-9. PubMed PMID: 12770025.
- 484 12. Tang B, Wang S, Zhang F. Two storage hexamerins from the beet armyworm *Spodoptera exigua*:  
485 cloning, characterization and the effect of gene silencing on survival. BMC Mol Biol. 2010;11:65. doi:  
486 10.1186/1471-2199-11-65. PubMed PMID: 20807423; PubMed Central PMCID: PMCPCMC2939506.
- 487 13. Gacek K, Bartkowiak-Broda I, Batley J. Genetic and Molecular Regulation of Seed Storage  
488 Proteins (SSPs) to Improve Protein Nutritional Value of Oilseed Rape (*Brassica napus* L.) Seeds.  
489 Frontiers in plant science. 2018;9:890. doi: 10.3389/fpls.2018.00890. PubMed PMID: 30013586;  
490 PubMed Central PMCID: PMCPCMC6036235.
- 491 14. Chen P, Shen Z, Ming L, Li Y, Dan W, Lou G, et al. Genetic Basis of Variation in Rice Seed Storage  
492 Protein (Albumin, Globulin, Prolamin, and Glutelin) Content Revealed by Genome-Wide Association  
493 Analysis. Frontiers in plant science. 2018;9:612. doi: 10.3389/fpls.2018.00612. PubMed PMID:  
494 29868069; PubMed Central PMCID: PMC5954490.
- 495 15. Wu Y, Yuan L, Guo X, Holding DR, Messing J. Mutation in the seed storage protein kafirin creates  
496 a high-value food trait in sorghum. Nature communications. 2013;4:2217. doi: 10.1038/ncomms3217.  
497 PubMed PMID: 23948869.
- 498 16. Ogawa K, Tojo S. Quantitative Changes of Storage Proteins and Vitellogenin during the  
499 Pupal-Adult Development in the Silkworm, *Bombyx Mori* (Lepidoptera, Bombycidae). Applied  
500 Entomology and Zoology. 1981;16:9.
- 501 17. Yu W, Wang M, Zhang H, Quan Y, Zhang Y. Expression and Functional Analysis of Storage Protein  
502 2 in the Silkworm, *Bombyx mori*. International journal of genomics. 2013;2013:145450. doi:  
503 10.1155/2013/145450. PubMed PMID: 23671839; PubMed Central PMCID: PMC3647547.
- 504 18. Chen J, Shu T, Chen J, Ye M, Lv Z, Nie Z, et al. Purification and Initial Functions of Sex-Specific  
505 Storage Protein 2 in *Bombyx mori*. The protein journal. 2015;34(4):256-66. doi:  
506 10.1007/s10930-015-9619-9. PubMed PMID: 26231571.
- 507 19. Xia Q, Li S, Feng Q. Advances in silkworm studies accelerated by the genome sequencing of  
508 *Bombyx mori*. Annu Rev Entomol. 2014;59:513-36. doi: 10.1146/annurev-ento-011613-161940.  
509 PubMed PMID: 24160415.
- 510 20. Daimon T, Kiuchi T, Takasu Y. Recent progress in genome engineering techniques in the



Running title: SP1 increased hatchability during silkworm domestication

- 511 silkworm, *Bombyx mori*. *Dev Growth Differ.* 2014;56(1):14-25. doi: 10.1111/dgd.12096. PubMed  
512 PMID: 24175911.
- 513 21. Chu JM, Yang R, Xia D, Gu W. The influence of light hours for copulation and oviposition of wild  
514 silkworms. *Sci Sericulture.* 1990;04:2.
- 515 22. Zhao QL, Li L, Wei ZJ, Zhang ZF. The selections affect analysis of silkworm in laying eggs. *Bullet*  
516 *Sericulture* 2001;3:3.
- 517 23. Chao H, Wang H, Wang X, Guo L, Gu J, Zhao W, et al. Genetic dissection of seed oil and protein  
518 content and identification of networks associated with oil content in *Brassica napus*. *Scientific reports.*  
519 2017;7:46295. doi: 10.1038/srep46295. PubMed PMID: 28393910; PubMed Central PMCID:  
520 PMC5385559.
- 521 24. Burmester T. Expression and evolution of hexamerins from the tobacco hornworm, *Manduca*  
522 *sexta*, and other Lepidoptera. *Insect biochemistry and molecular biology.* 2015;62:226-34. doi:  
523 10.1016/j.ibmb.2014.11.009. PubMed PMID: 25497415.
- 524 25. Lee BC, Kaya A, Ma S, Kim G, Gerashchenko MV, Yim SH, et al. Methionine restriction extends  
525 lifespan of *Drosophila melanogaster* under conditions of low amino-acid status. *Nature*  
526 *communications.* 2014;5:3592. doi: 10.1038/ncomms4592. PubMed PMID: 24710037; PubMed  
527 Central PMCID: PMC4350766.
- 528 26. Tetlak AG, Burnett JB, Hahn DA, Hatle JD. Vitellogenin-RNAi and ovariectomy each increase  
529 lifespan, increase protein storage, and decrease feeding, but are not additive in grasshoppers.  
530 *BioGerontology.* 2015;16(6):761-74. doi: 10.1007/s10522-015-9599-3. PubMed PMID: 26298568;  
531 PubMed Central PMCID: PMC4605866.
- 532 27. Osanai M, Okudaira M, Naito J, Demura M, Asakura T. Biosynthesis of L-alanine, a major amino  
533 acid of fibroin in *Samia cynthia ricini*. *Insect biochemistry and molecular biology.* 2000;30(3):225-32.  
534 PubMed PMID: 10732990.
- 535 28. Tojo S, Nagata M, Kobayashi M. Storage Proteins in the Silkworm, *Bombyx Mori*. . *Insect*  
536 *Biochem.* 1980;10:5.
- 537 29. Khokhar A, Chen N, Yuan JP, Li Y, Landis GN, Beaulieu G, et al. Conditional switches for  
538 extracellular matrix patterning in *Drosophila melanogaster*. *Genetics.* 2008;178(3):1283-93. doi:  
539 10.1534/genetics.106.065912. PubMed PMID: 18245854; PubMed Central PMCID: PMC2278091.
- 540 30. Chan D, Thomas CJ, Taylor VJ, Burke RD. Integrins on eggs: focal adhesion kinase is activated at  
541 fertilization, forms a complex with integrins, and is necessary for cortex formation and cell cycle  
542 initiation. *Mol Biol Cell.* 2013;24(21):3472-81. doi: 10.1091/mbc.E13-03-0148. PubMed PMID:  
543 23985318; PubMed Central PMCID: PMC3814141.
- 544 31. Levi BP, Ghabrial AS, Krasnow MA. *Drosophila* talin and integrin genes are required for  
545 maintenance of tracheal terminal branches and luminal organization. *Development.*  
546 2006;133(12):2383-93. doi: 10.1242/dev.02404. PubMed PMID: 16720877.
- 547 32. Jin J. Folic Acid Supplementation for Prevention of Neural Tube Defects. *JAMA.* 2017;317(2):222.  
548 doi: 10.1001/jama.2016.19767. PubMed PMID: 28097357.
- 549 33. Grzelakowska B, Zielinska ZM. Folate Derivatives in the Metabolism of Insects. li. Biosynthesis of  
550 Nucleic Acids in the Polytrophic Ovaries of the Diapausing Larvae of *Acantholyda Nemoralis* Thoms. As  
551 Promoted by Folic Acid and Its 4-Aminoanalogue. *Journal of insect physiology.* 1965;11:431-42.  
552 PubMed PMID: 14288372.
- 553 34. Blatch SA, Stabler SP, Harrison JF. The effects of folate intake on DNA and single-carbon pathway  
554 metabolism in the fruit fly *Drosophila melanogaster* compared to mammals. *Comparative*



Running title: SP1 increased hatchability during silkworm domestication

- 555 biochemistry and physiology Part B, Biochemistry & molecular biology. 2015;189:34-9. doi:  
556 10.1016/j.cbpb.2015.07.007. PubMed PMID: 26219578.
- 557 35. Zielinska ZM, Grzelakowska B. Folate Derivatives in the Metabolism of Insects. I. Mitoses in Cells  
558 of the Follicular Epithelium as Evoked in *Acantholyda Nemoralis* Thoms. By Folate and Its  
559 4-Aminoanalogue. Journal of insect physiology. 1965;11:405-11. PubMed PMID: 14288370.
- 560 36. Xia Q, Guo Y, Zhang Z, Li D, Xuan Z, Li Z, et al. Complete Resequencing of 40 Genomes Reveals  
561 Domestication Events and Genes in Silkworm (*Bombyx*). Science. 2009. PubMed PMID: 19713493.
- 562 37. Tamura K, Stecher G, Peterson D, Filipski A, Kumar S. MEGA6: Molecular Evolutionary Genetics  
563 Analysis version 6.0. Molecular biology and evolution. 2013;30(12):2725-9. doi:  
564 10.1093/molbev/mst197. PubMed PMID: 24132122; PubMed Central PMCID: PMC3840312.
- 565 38. Naito Y, Hino K, Bono H, Ui-Tei K. CRISPRdirect: software for designing CRISPR/Cas guide RNA  
566 with reduced off-target sites. Bioinformatics. 2015;31(7):1120-3. doi: 10.1093/bioinformatics/btu743.  
567 PubMed PMID: 25414360; PubMed Central PMCID: PMC4382898.
- 568 39. Ghosh S, Chan CK. Analysis of RNA-Seq Data Using TopHat and Cufflinks. Methods Mol Biol.  
569 2016;1374:339-61. doi: 10.1007/978-1-4939-3167-5\_18. PubMed PMID: 26519415.

570

571

572

Running title: SP1 increased hatchability during silkworm domestication

573 **Figure Legends**

574 **Figure 1. Molecular evolution of silkworm SPs. (A)** Phylogenetic tree of insect  
575 Storage proteins based on Bayesian inference analyses. Full-length amino acid  
576 sequences were aligned to generate a phylogenetic tree. Bayesian posterior probability  
577 was shown for each node. Cf, *Choristoneura fumiferana*; Bm, *Bombyx mori*; Hc,  
578 *Hyalophora cecropia*; Sr, *Samia ricini*; Ms, *Manduca sexta*; Ob, *Operophtera*  
579 *brumata*; Hyc, *Hyphantria cunea*; Sl, *Spodoptera litura*; Sn, *Sesamia nonagrioides*;  
580 Cs, *Chilo suppressalis*; Pi, *Plodia interpunctella*; Px, *Plutella xylostella*; Ad,  
581 *Anopheles darlingi*; Ca, *Corethrella appendiculata*; Dm, *Drosophila melanogaster*;  
582 Pm, *Perla marginata*; Td, *Thermobia domestica*. Accession number for each protein is  
583 indicated ahead of abbreviation of each species. **(B-C)** . Selection signatures of the  
584 silkworm SPs. Signature index— Population divergence coefficient (Fst) between the  
585 Chinese local trimoulting(CHN\_L\_M3) domestic silkworm group and the wild  
586 silkworms and nucleic acid diversity ( $\pi$ ) in the silkworm populaton is shown along the  
587 genomic regions covering the *SP* genes. Dashed lines represent the top 1% Fst cutoff.  
588 The red square represents *SP1* region which is located in Chromosome 23 and the  
589 blue squares represents the other *SPs* which are clustered in Chromosome 3. **(D)**  
590 Plotting of frequency of reference genotype for each SNP position in the upstream 2  
591 kb region of *SP1* , indicating many mutant alleles with fairly high allelic frequency in  
592 the wild silkworm population. **(E)** Expression level indicated as FPKM of *SP1* in the  
593 ova of domestic and wild silkworms. The three data pot indicate the highest value  
594 with 95% confidence, the average and the lowest value with 95% confidence,

Running title: SP1 increased hatchability during silkworm domestication

595 respectively. \*\*\*, FDR corrected  $p < 0.001$ . Dome, the domestic silkworm. Wild, the  
596 wild silkworm.

597 **Figure 2. Cas9/sgRNA mediated gene editing of *SP1* in the silkworm. (A)**

598 Schematic diagram of sgRNA targeting sites. The five boxes indicate the five exons  
599 of *BmSp1*, and the black line with blocks represents the gene locus (blocks, exons;  
600 lines between blocks, introns). All sgRNA targeting sites are located on the first exon  
601 (S1, S2, and S3) and the PAM sequence is labeled in red. Sp1-F and Sp1-R were the  
602 primers used for mutation screening. **(B)** Various types of mutations in G0 injected  
603 embryos. Deletions are indicated by hyphens and insertions are shown in blue  
604 lowercase letters. The PAM sequence is in red. **(C)** Two types of mutations identified  
605 from homozygous mutant silkworms. W, wild type. MU1, *SP1* mutant type 1. There  
606 was an 8bp insertion followed by a 63 bp deletion in the *SP1* coding sequences; MU2,  
607 *SP1* mutant type 2. there was a 4 bp insertion followed by a 65 bp deletion. **(D)**  
608 Comparison of inferred amino acid sequences of homozygous mutant silkworms and  
609 the wild type. The missing amino acids are replaced with dashes. Premature stop  
610 codons are shown in red asterisk. **(E)** Phenotype assay of the mutants. Hatching rate  
611 of *SP1* mutants (MU1) decreased to about 51%. In total, 83 replicates of hatchings for  
612 MU1, 43 replicates for MU2 and 14 replicates for wild-type were used for statistical  
613 analysis. Number of egg produced, whole cocoon weight, pupa weight and cocoon  
614 layer weight, and pupa weight/whole cocoon weight ratio of mutants and wild-type  
615 silkworms, indicating no significant differences. In total, 32 replicates for mutants and  
616 11 replicates for wild-type were used. Error bar: SD. **(F)** Expression level indicated as

Running title: SP1 increased hatchability during silkworm domestication

617 FPKM of *SP1* and *Vg* in the ova of domestic and wild silkworms. The three data pots  
618 indicate the highest value with 95% confidence, the average and the lowest value with  
619 95% confidence, respectively. \*, \*\* and \*\*\* represented significant differences at the  
620 0.05, 0.01, 0.001 level (t-test).

621 **Figure 3. The artificial selection on *SP1* might improve silkworm hatching rate**  
622 **during domestication. (A)** The egg production and hatching rates in the domestic  
623 group and wild silkworms. Error bar: SD. Wild\_1 and Wild\_2 indicated the results  
624 from two repeat times **(B)** Expression level indicated as FPKM of *Vg* in the ova of  
625 domestic and wild silkworms. The three data pots indicate the highest value with 95%  
626 confidence, the average and the lowest value with 95% confidence, respectively. \*, \*\*  
627 and \*\*\* represented significant differences at the 0.05, 0.01, 0.001 level.

628 **Figure 4. Differential expressed genes (DEGs) and functional enrichment**  
629 **analysis of the common genes from DEGs of two comparisons, i.e., from mutant**  
630 **VS the wild type, and from the wild and the domestic silworm. (A)** Venn diagram  
631 of the DEGs between the wild type and the mutant, as well as domestic and wild  
632 silkworm (*Bombyx mandarina*). The blue venn diagram represents the total  
633 differentially expressed gene, The green venn diagram and the red venn diagram  
634 represent down-regulated differentially expressed and up-regulated differentially  
635 expressed, respectively. **(B)** Functional enrichment analysis of common genes shared  
636 in the two sets of DEGs. Corrected p-value: p-value in hypergeometric test after FDR  
637 correction. All non-redundant terms that had Corrected p-value < 0.05 is shown.

638

Running title: SP1 increased hatchability during silkworm domestication

639 **Supporting Information Caption**

640 **S1 Fig. SNPs between wild and domestic silkworm groups that cause non-**  
641 **synonymous mutations of SP1. (A).** Amino acid alignment of SP1 protein of the  
642 domestic silkworm (*B.mori*) and the deduced SP1 protein sequence of the wild  
643 silkworm (*B. mandarina*) by inferred SNP data. **(B).** Allelic frequencies of the 11  
644 non- synonymous mutations in the wild (the left column) and domestic silkworm (the  
645 right column). Blue, reference allele; Black, alternative allele. The 11 mutations of  
646 amino acid were labelled with numerals in red.

647 **S2 Fig. Scheme of ECM-receptor interaction pathway.** The shared DEGs of ova in  
648 two sets of comparison (SP1 mutant vs wild type and wild vs domestic silkworm) are  
649 indicated by red frames.

650 **S3 Fig. Scheme of folate biosynthesis pathway.** The shared DEGs of ova in two sets  
651 of comparison (SP1 mutant vs wild type and wild vs domestic silkworm) are indicated  
652 by red frames.

653 **S4 Fig. Scheme of Ribosome pathway.** The DEGs of ova between the wild and  
654 domestic silkworm are indicated by red frames.

655 **S1 Table. Summary of RNA-seq data.**

656 **S2 Table. Information of the differentially expressed genes between SP1 mutant**  
657 **(MU1) and the wild type (WT) domestic silkworm.**

658 **S3 Table. Information of the differentially expressed genes between the wild and**  
659 **the domestic (Dome) silkworms.**

Running title: SP1 increased hatchability during silkworm domestication

**Table 1. Basic information and methionine composition of silkworm SPs.**

|                  | <b>Protein length<br/>(KD)</b> | <b>Protein weight<br/>(No. amino acid)</b> | <b>No. Met</b> | <b>Proportion of<br/>Met (%)</b> |
|------------------|--------------------------------|--------------------------------------------|----------------|----------------------------------|
| <b>SP1</b>       | 87.25                          | 747                                        | 82             | <b>10.98</b>                     |
| <b>SSP2</b>      | 83.45                          | 703                                        | 23             | 3.27                             |
| <b>SP2</b>       | 83.46                          | 704                                        | 27             | 3.84                             |
| <b>SP3</b>       | 82.85                          | 696                                        | 22             | 3.16                             |
| <b>Bmor_9524</b> | 87.39                          | 743                                        | 49             | 6.59                             |
| <b>Bmor_9525</b> | 99.02                          | 866                                        | 18             | 2.08                             |
| <b>Bmor_9527</b> | 77.61                          | 651                                        | 20             | 3.07                             |
| <b>Bmor_9880</b> | 47.42                          | 441                                        | 3              | 0.73                             |

660

661 **Table 2 Primers used in this study**

| Primer     | Name                                                                                 | Primer                              |
|------------|--------------------------------------------------------------------------------------|-------------------------------------|
| Sp1gRNA1-f | gaaattaatacgaactcactataTCTAGTACTACTGGCCTGCTgtttagagctagaaatagc                       | Preparation of sgRNA templates      |
| Sp1gRNA2-f | gaaattaatacgaactcactataACTACTGGCCTGCTTGGCCGgtttagagctagaaatagc                       | Preparation of sgRNA templates      |
| Sp1gRNA3-f | gaaattaatacgaactcactataGGTCTTCACCAAGGAACCAAgtttagagctagaaatagc                       | Preparation of sgRNA templates      |
| Sp1gRNA-r  | AAAAGCACCGACTCGGTGCCACTTTTTCAAGTTGATAACGGACTAGCCTTA<br>TTTTAACTTGCTATTTCTAGCTCTAAAAC | Preparation of sgRNA templates      |
| Sp1-F      | CGGAAATATGGCCTATAATGCT                                                               | Identification of somatic mutations |
| Sp1-R      | TGTCTACACGGATCATCACC                                                                 | Identification of somatic mutations |

662 Note: Sp1gRNA1-f , Sp1gRNA2-f , Sp1gRNA3-f , Sp1gRNA-r were used for amplification of DNA templates to generate gRNAs targeting S1,

663 S2, S3 sites; Sp1-F and Sp1-R for detection of targeting sites.

664

665

666

667

668

669

670

671

672

673

674

675

**Table 3. Functional Enrichment of differential expressed genes between the loss-of-function *SP1* mutants and the wild-type domestic silkworms.**

| <b>ID</b>                 | <b>Description</b>                | <b>Corrected p value</b> | <b>Enrichment fold</b> | <b>No. DEGs</b> | <b>No. down regulated genes</b> |
|---------------------------|-----------------------------------|--------------------------|------------------------|-----------------|---------------------------------|
| ko04512                   | ECM-receptor interaction          | 0.07278                  | 1.78230                | 7               | 5                               |
| <b>Molecular Function</b> |                                   |                          |                        |                 |                                 |
| GO:0005213                | Structural constituent of chorion | 0.00008                  | 16.35621               | 6               | 5                               |
| GO:0004497                | Monooxygenase activity            | 0.00204                  | 3.73348                | 14              | 4                               |
| GO:0016491                | Oxidoreductase activity           | 0.00295                  | 1.92136                | 39              | 21                              |
| GO:0005506                | Iron ion binding                  | 0.01655                  | 2.91085                | 14              | 6                               |
| GO:0004517                | Nitric-oxide synthase activity    | 0.04483                  | 24.53431               | 2               | 0                               |
| GO:0046906                | Tetrapyrrole binding              | 0.04483                  | 2.99199                | 10              | 4                               |
| GO:0005215                | Transporter activity              | 0.04483                  | 1.75245                | 30              | 23                              |
| <b>Biological Process</b> |                                   |                          |                        |                 |                                 |
| GO:0051704                | Multi-organism process            | 0.00000                  | 10.6227                | 13              | 7                               |
| GO:0007292                | Female gamete generation          | 0.00001                  | 15.2532                | 6               | 5                               |
| GO:0030703                | Eggshell formation                | 0.00001                  | 15.2532                | 6               | 5                               |
| GO:0030707                | Ovarian follicle cell development | 0.00001                  | 15.2532                | 6               | 5                               |
| GO:0002376                | Immune system process             | 0.00005                  | 7.9582                 | 8               | 2                               |
| GO:0009607                | Response to biotic stimulus       | 0.00008                  | 8.8977                 | 7               | 1                               |
| GO:0042742                | Defense response to bacterium     | 0.00027                  | 9.1519                 | 6               | 0                               |
| GO:0006810                | Transport                         | 0.00070                  | 1.7538                 | 44              | 32                              |
| GO:0019731                | Antibacterial humoral response    | 0.00208                  | 8.1713                 | 5               | 0                               |



Running title: SP1 increased hatchability during silkworm domestication

|            |                                           |         |         |   |   |
|------------|-------------------------------------------|---------|---------|---|---|
| GO:0044707 | Single-multicellular organism process     | 0.00715 | 3.5503  | 9 | 7 |
| GO:0006809 | Nitric oxide biosynthetic process         | 0.01570 | 22.8797 | 2 | 0 |
| GO:0000041 | Transition metal ion transport            | 0.03106 | 8.5799  | 3 | 1 |
| GO:0051188 | Cofactor biosynthetic process             | 0.04184 | 5.3835  | 4 | 3 |
| GO:0018149 | Peptide cross-linking                     | 0.04248 | 15.2532 | 2 | 0 |
| GO:0072593 | Reactive oxygen species metabolic process | 0.04273 | 7.6266  | 3 | 0 |

---

676

**Table 4. Functional enrichment of differential expressed genes between the wild and domestic silkworms.**

| <b>ID</b>                 | <b>Description</b>                        | <b>Corrected p value</b> | <b>Enrichment fold</b> | <b>No. DEGs</b> | <b>No. down regulated genes</b> |
|---------------------------|-------------------------------------------|--------------------------|------------------------|-----------------|---------------------------------|
| ko03010                   | Ribosome                                  | 0.00001                  | 2.08066                | 50              | 49                              |
| <b>Molecular Function</b> |                                           |                          |                        |                 |                                 |
| GO:0003735                | Structural constituent of ribosome        | 0.00003                  | 2.12234                | 44              | 42                              |
| <b>Biological Process</b> |                                           |                          |                        |                 |                                 |
| GO:0007292                | Female gamete generation                  | 0.12304                  | 2.99379                | 6               | 5                               |
| GO:0007304                | Chorion-containing eggshell formation     | 0.12304                  | 2.99379                | 6               | 5                               |
| GO:0046700                | Heterocycle catabolic process             | 0.12304                  | 2.56610                | 8               | 5                               |
| GO:0009653                | Anatomical structure morphogenesis        | 0.12304                  | 2.99379                | 6               | 5                               |
| GO:0019953                | Sexual reproduction                       | 0.12304                  | 2.99379                | 6               | 5                               |
| GO:0030707                | Ovarian follicle cell development         | 0.12304                  | 2.99379                | 6               | 5                               |
| GO:1901361                | Organic cyclic compound catabolic process | 0.12304                  | 2.69441                | 9               | 6                               |
| GO:1901564                | Organonitrogen compound metabolic process | 0.12304                  | 1.29411                | 117             | 98                              |
| GO:0043603                | Cellular amide metabolic process          | 0.12304                  | 1.50499                | 62              | 57                              |
| GO:0043604                | Amide biosynthetic process                | 0.12304                  | 1.48862                | 60              | 55                              |
| GO:0043043                | Peptide biosynthetic process              | 0.12304                  | 1.42885                | 56              | 52                              |

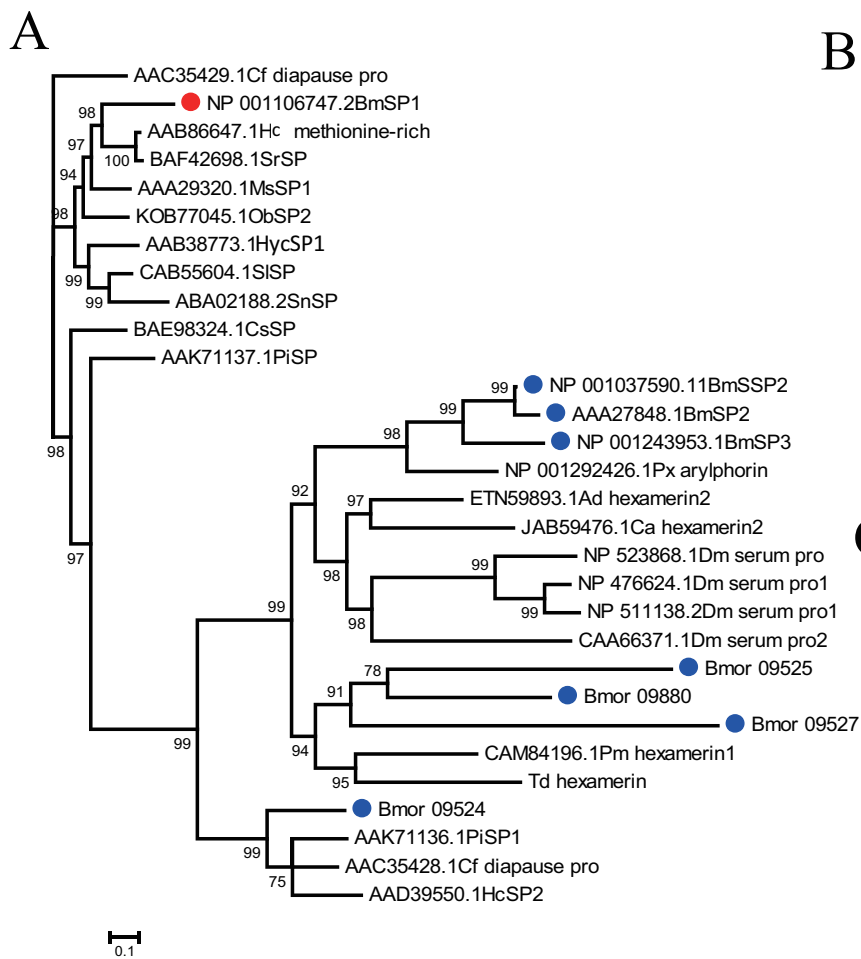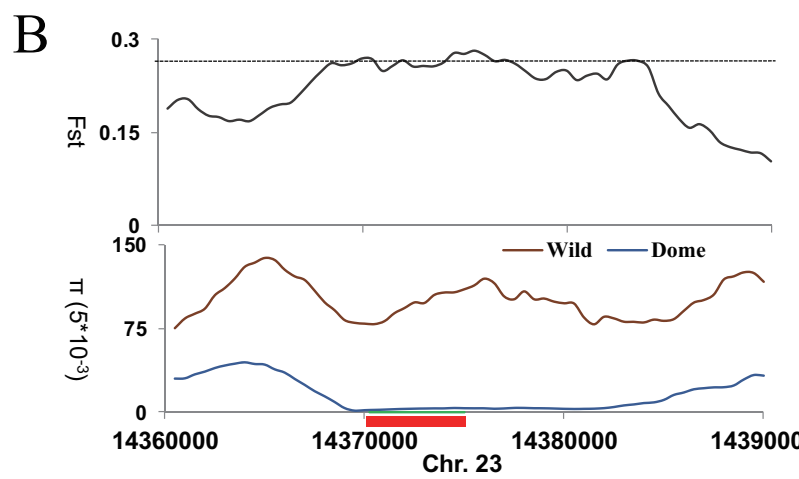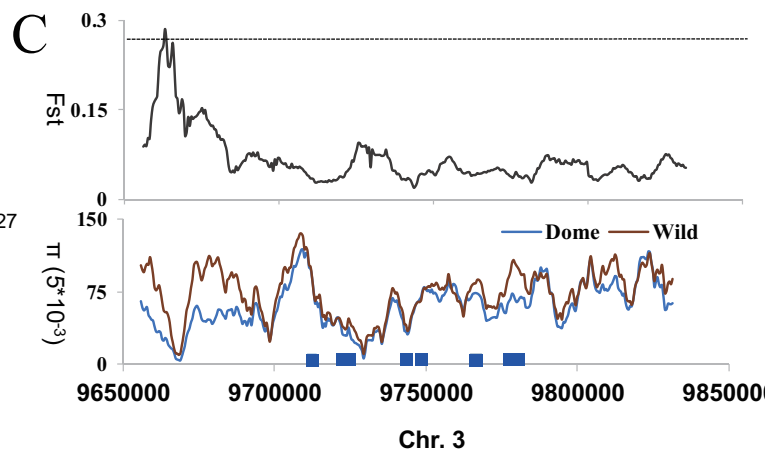

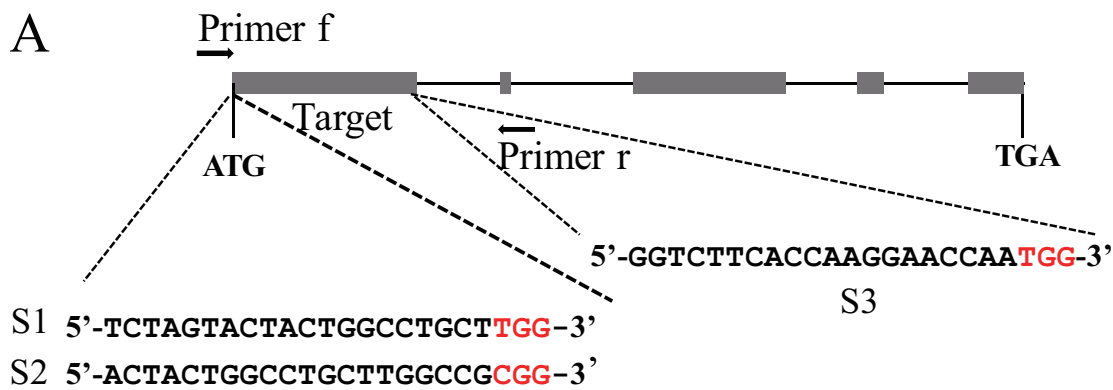

S1 5'-TCTAGTACTACTGGCCTGCTTGG-3'  
S2 5'-ACTACTGGCCTGCTTGGCCGCGG-3'

**B**

ATGAGGGTTCTAGTACTACTGGCCTGCTTGGCCGCGG (49 bp) GGAACCAATGG (W)  
 ATGAGGGTTCTAGTACTAC-----TGGCCGCGG (49 bp) GGAACCAATGG (1)  
 ATGAGGGTTCTAGTACTACTGGCCTGCTTGGCCGCGG (49 bp) G----CAATGG (2)  
 ATGAGGGTTCTAGTACTACTGGCCTGCTTGGCCGCGG (49 bp) -----TGG (3)  
 ATGAGGGTTCTAGTACTACTGGCC-----GCGG (49 bp) GGAACCAATGG (4)  
 ATGAGGGTTCTAGTACTACTGGCCTGCT-G-----/-----CAATGG (5)  
 ATGAGGGTTCTAGTACTACTGGCCTGCT-GAGTGCTG/-----CAATGG (6)

**C**

ATGAGGGTTCTAGTACTACTGGCCTGCTTGGCCGCGG (54 bp) CAATGG (W)  
 ATGAGGGTTCTAGTACTACTGGCCTGCT-G-----/-----CAATGG (MU1)  
 ATGAGGGTTCTAGTACTACTGGCCTGCT-GAGTGCTG/-----CAATGG (MU2)

**D**

MRVLVLLACLAAASATAISGGYGTMVFTKEPMVNLDK (W)  
 MRVLVLLAC\*VLQWVSSSIILYNLHINLASLGYFDG\*A (MU1)  
 MRVLVLLA--WVQWVSSSIILYNLHINLASLGYFDG\*A (MU2)

**E**

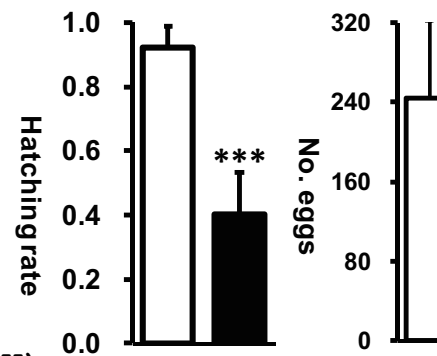

**F**

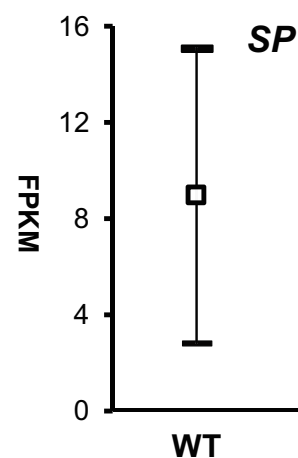

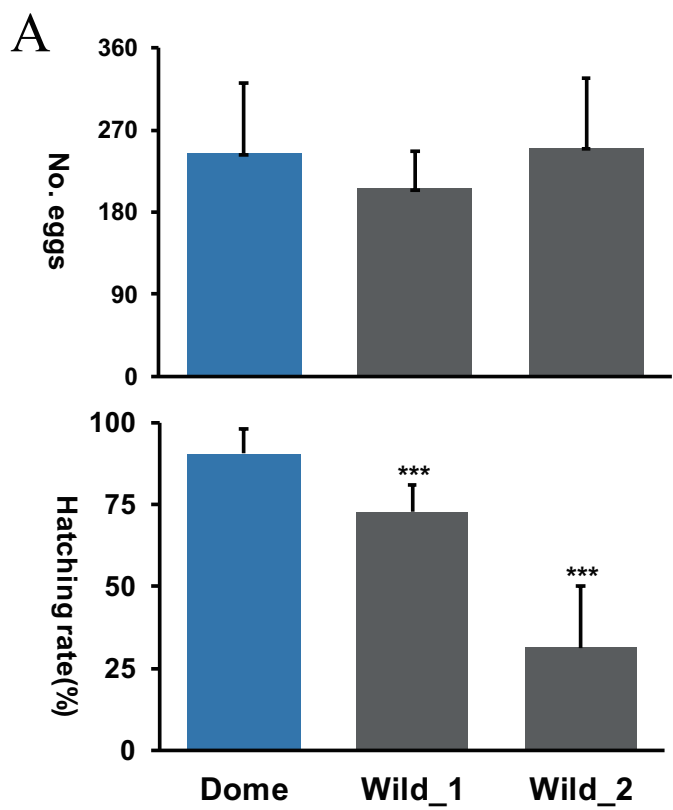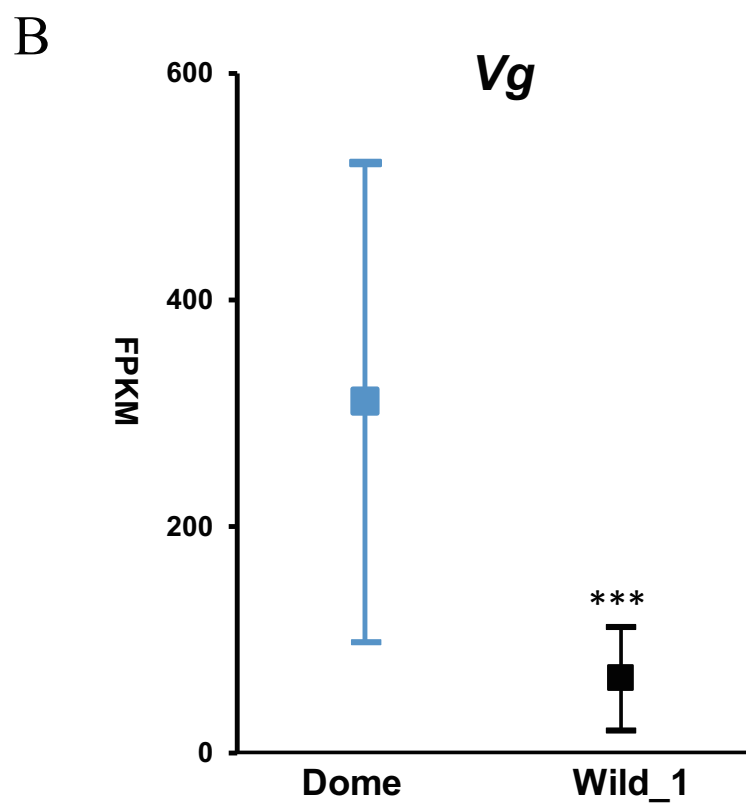

A

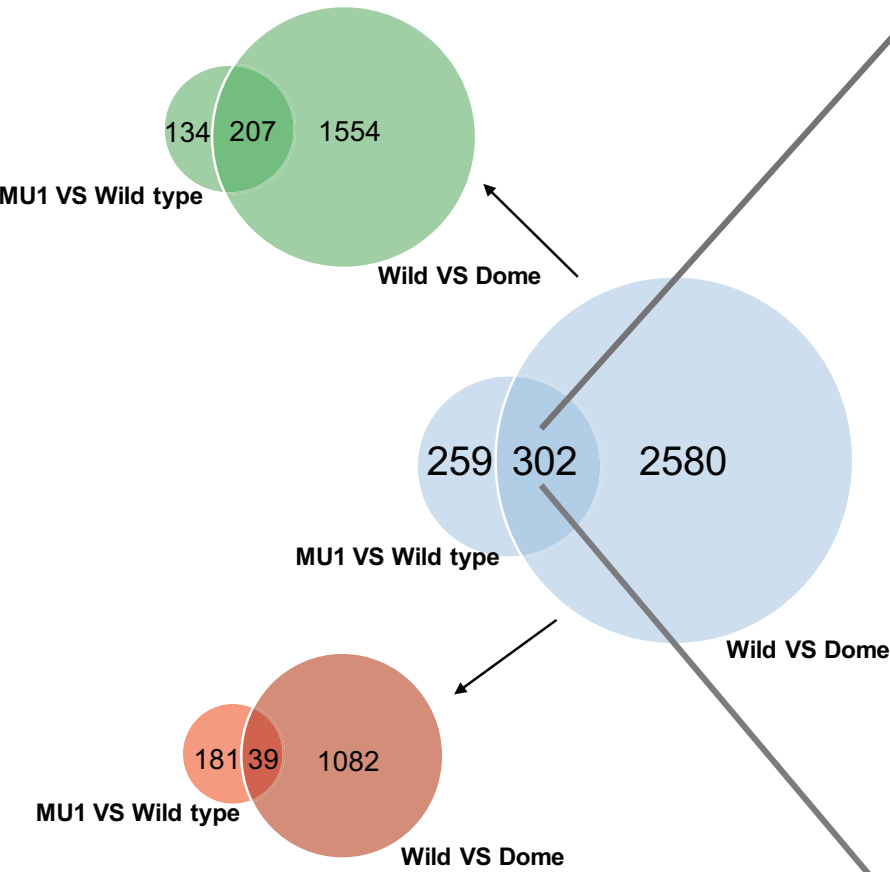

B

|                                                    | Corrected p value |
|----------------------------------------------------|-------------------|
| <b>Significant enriched pathway</b>                |                   |
| ECM-receptor interaction (ko04512)                 | 0.0015            |
| Folate biosynthesis (ko00790)                      | 0.0330            |
| <b>Significant enriched GO term</b>                |                   |
| Female gamete generation (0007292) BP              | 0.0006            |
| Chorion-containing eggshell formation (0007304) BP | 0.0006            |
| Ovarian follicle cell development (0030707) BP     | 0.0006            |
| Multicellular organism reproduction (0032504) BP   | 0.0006            |
| Single-multicellular organism process (0044707) BP | 0.0057            |
| Multi-organism process (0051704) BP                | 0.0057            |
| Single-organism developmental process (0044767) BP | 0.0098            |
| Coenzyme biosynthetic process (0009108) BP         | 0.0148            |
| Transport (0006810) BP                             | 0.0307            |
| Structural constituent of chorion (0005213) MF     | 0.0046            |
